# Supplementary material for: Stress/pressure-stabilized cubic polymorph of Li3Sb with improved thermoelectric performance
Source: Royal Society of Chemistry journal article supplement (doi:10.1039/d1ta07763e), 2021-01-01
Supplement: d1ta07763e1.pdf [file d1ta07763e1.pdf]

## Electronic Supplementary Information

### Stress/Pressure-Stabilized Cubic Polymorph of $\text{Li}_3\text{Sb}$ with Improved Thermoelectric Performance

Mujde Yahyaoglu,<sup>a,b</sup> Thomas Soldi,<sup>c</sup> Melis Ozen,<sup>a,b</sup> Christophe Candolfi,<sup>d</sup> G. Jeffrey Snyder,<sup>\*c</sup> Umut Aydemir<sup>\*b,e</sup>

<sup>a</sup> Graduate School of Sciences and Engineering, Koç University, Istanbul-34450, Turkey

<sup>b</sup> Koç University Boron and Advanced Materials Application and Research Center, Istanbul-34450, Turkey

<sup>c</sup> Department of Materials Science and Engineering, Northwestern University, Evanston, IL-60208, USA

<sup>d</sup> Institut Jean Lamour, Université de Lorraine, Nancy Cedex-54011, France

<sup>e</sup> Department of Chemistry, Koç University, Sariyer, Istanbul, 34450, Turkey

Emails: [jeff.snyder@northwestern.edu](mailto:jeff.snyder@northwestern.edu), [uaydemir@ku.edu.tr](mailto:uaydemir@ku.edu.tr)

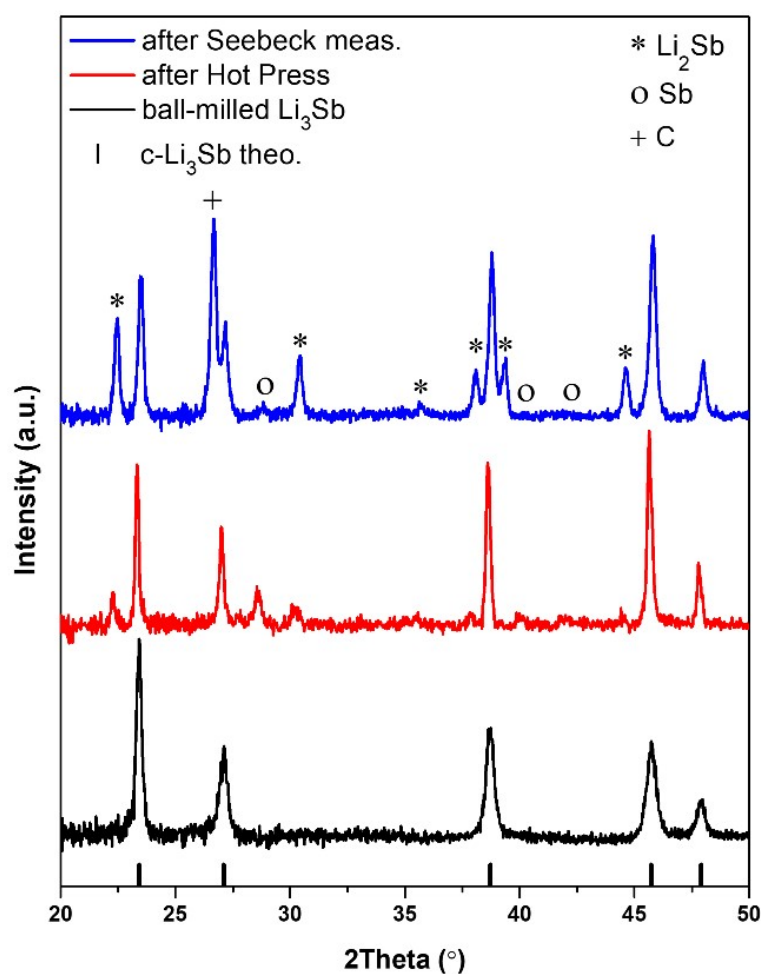

**Figure S1.** Experimental XRD patterns (Cu  $\text{K}\alpha$ ) of as synthesized (ball milled) powder (black) and hot pressed (red)  $\text{Li}_3\text{Sb}$  samples along with the data after Seebeck measurement (blue). Ticks mark the calculated reflection positions of the c- $\text{Li}_3\text{Sb}$ .

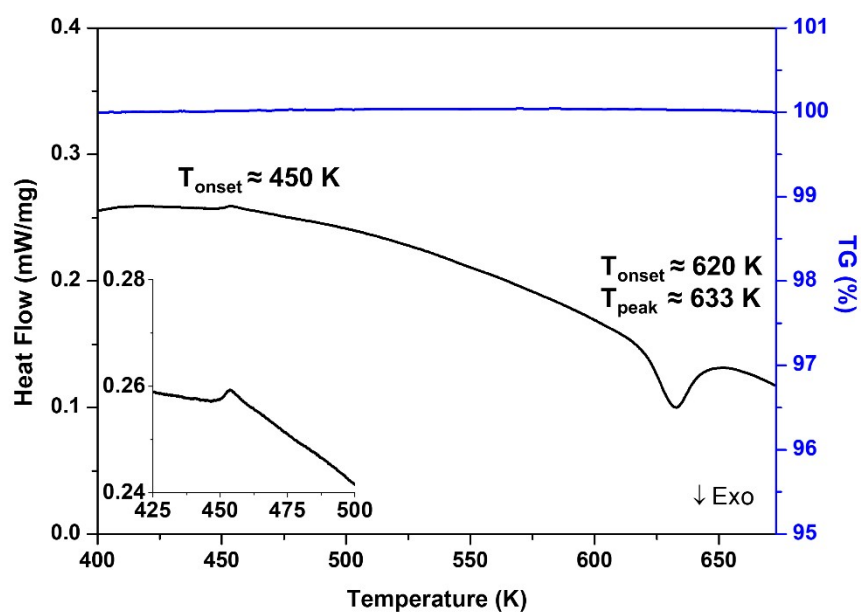

**Figure S2.** DSC/TG diagrams of c-Li<sub>3</sub>Sb (scanning rate 10 K min<sup>-1</sup>) showing an endothermic peak at  $T_{\text{onset}} \approx 450$  K and an exothermic peak at  $T_{\text{onset}} \approx 620$  K and  $T_{\text{peak}} \approx 633$  K.

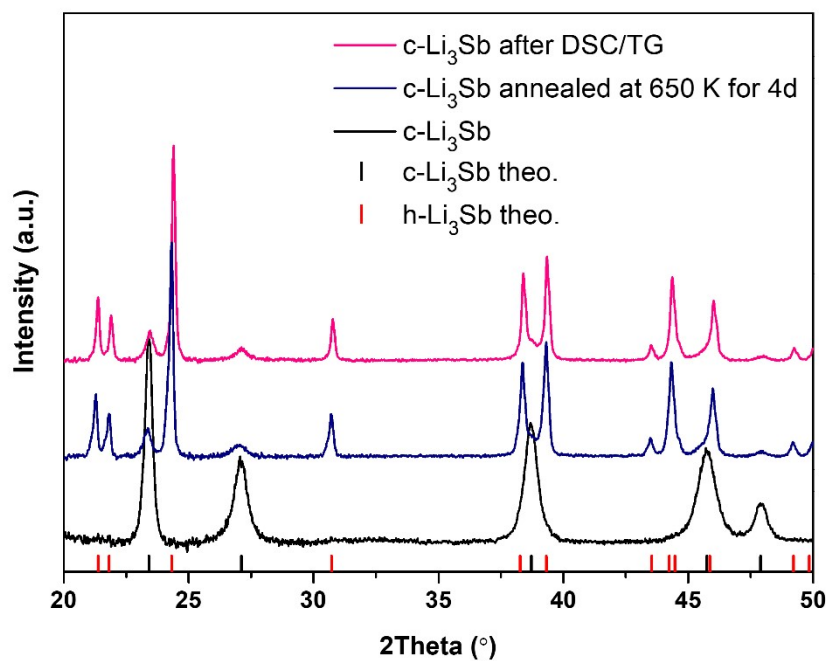

**Figure S3.** Experimental XRD patterns (Cu K $\alpha$ ) of as synthesized c-Li<sub>3</sub>Sb powder (black), c-Li<sub>3</sub>Sb annealed at 650 K for 4d (blue), and c-Li<sub>3</sub>Sb after the DSC/TG measurement. Black and red ticks mark the calculated reflection positions of the c-Li<sub>3</sub>Sb and h-Li<sub>3</sub>Sb, respectively.



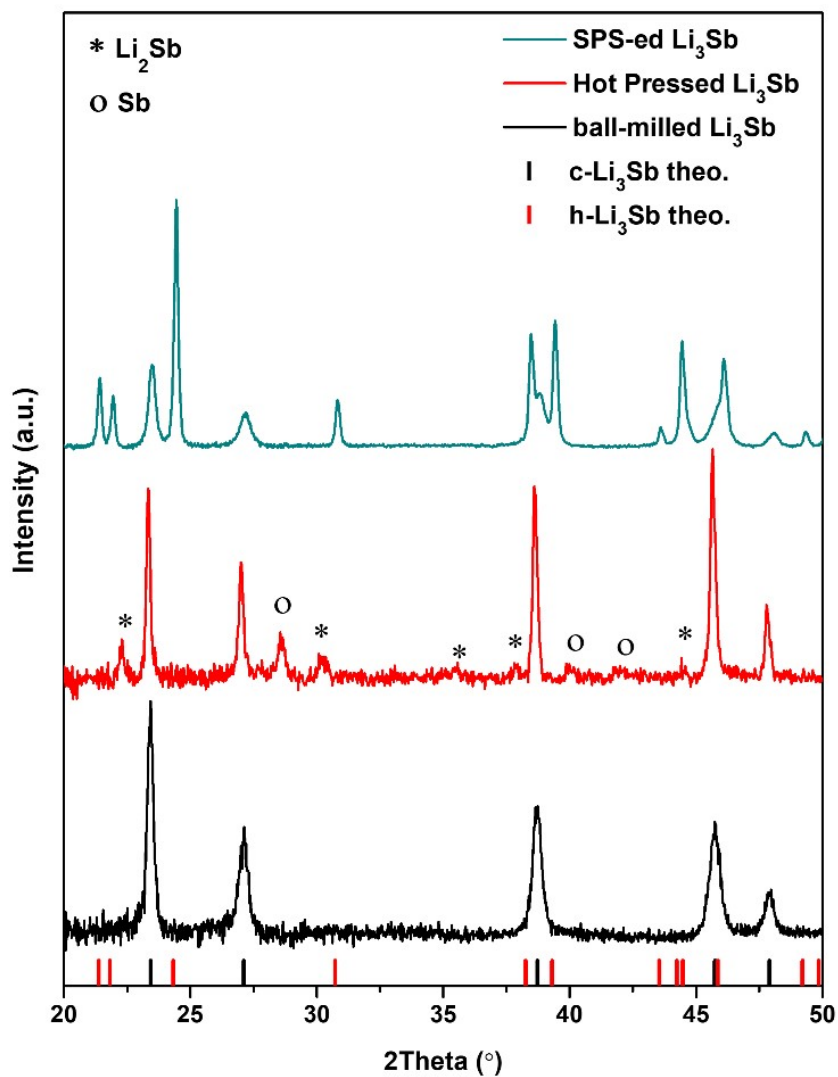

**Figure S4.** Experimental XRD patterns (Cu  $\text{K}\alpha$ ) of as synthesized powder (black), hot pressed (red), and SPS-ed (green)  $\text{Li}_3\text{Sb}$  samples. Black and red ticks mark the calculated reflection positions of the c- $\text{Li}_3\text{Sb}$  and h- $\text{Li}_3\text{Sb}$ , respectively.

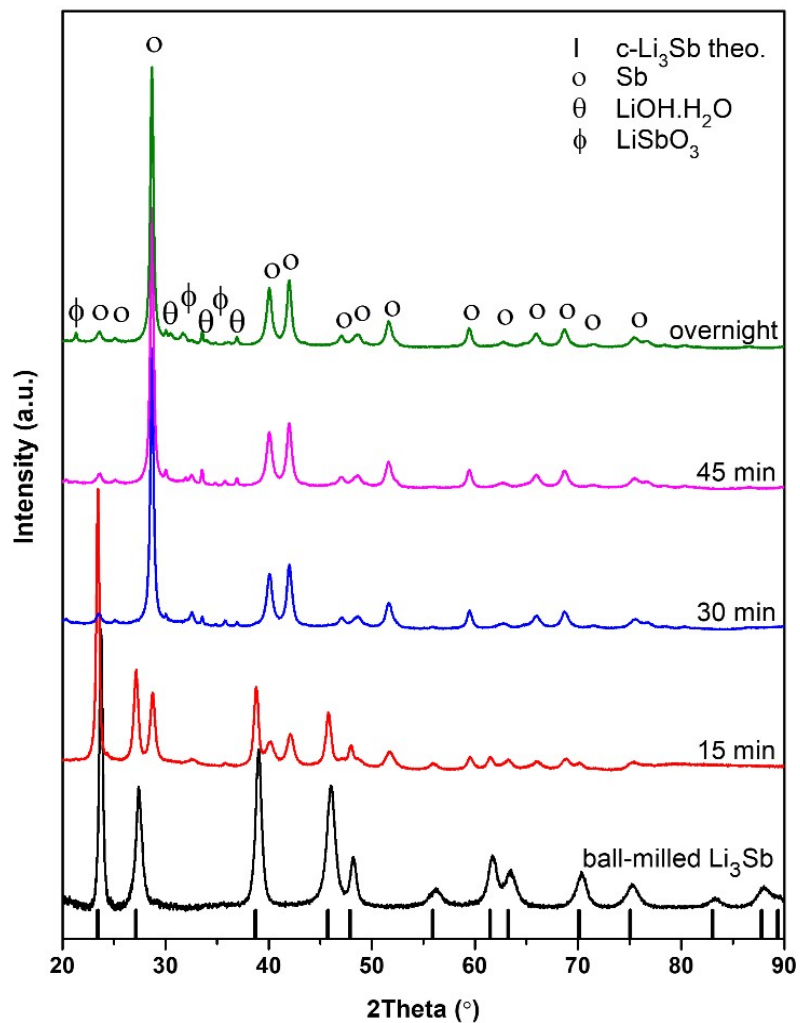

**Figure S5.** Experimental XRD patterns (Cu  $K\alpha$ ) of as synthesized powder (with Kapton foil) and air exposed  $\text{Li}_3\text{Sb}$  samples. Each scan corresponds to about 15 minutes of exposure (red, blue, and pink) and an overnight exposure (green). Ticks mark the calculated reflection positions of the c- $\text{Li}_3\text{Sb}$ .

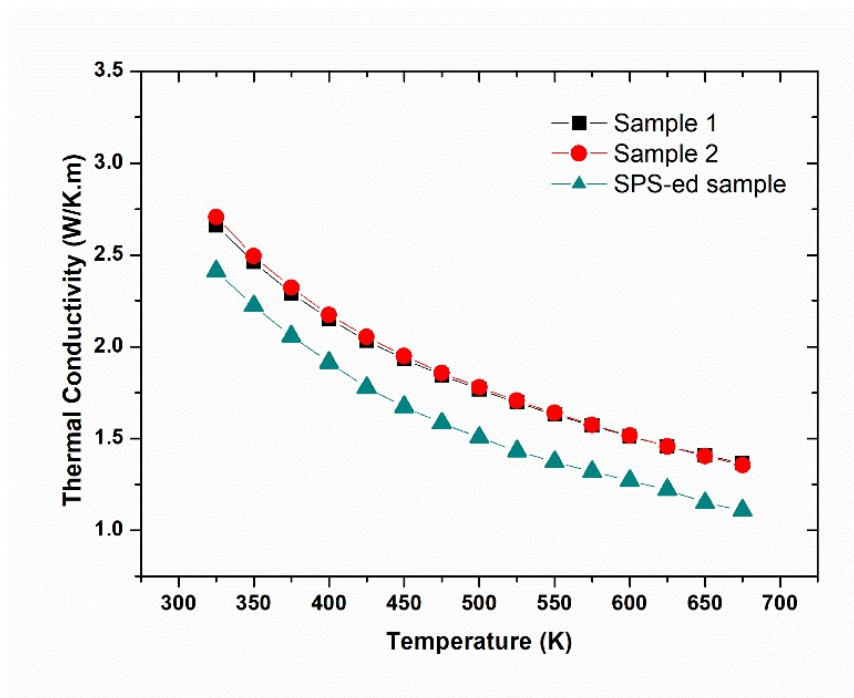

**Figure S6.** Temperature dependence of the total thermal conductivity of hot pressed (sample 1 and sample 2) and SPS treated (green)  $\text{Li}_3\text{Sb}$  samples.
